# Supplementary material for: Acacia senegal Budmunchiamines as a Potential Adjuvant for Rejuvenating Phenicol Activities towards Escherichia coli-Resistant Strains
Source: MDPI journal article supplement (doi:10.3390/ijms24108790), 2023-05-15
Supplement: s1 [file s1]

## Supplementary Data

**Table S1: Bacterial strains used in this study**

| Strains             | Description                                                                                                | Reference |
|---------------------|------------------------------------------------------------------------------------------------------------|-----------|
| <i>E. coli</i>      |                                                                                                            |           |
| AG100               | Parental <i>E. coli</i> K-12 Porin <sup>+</sup> ; basal efflux                                             | [1]       |
| AG100A              | AG100 <i>acrAB</i> : Kan <sup>r</sup> non ( <i>AcrAB</i> ); porin <sup>+</sup>                             |           |
| AG102               | AG100 overexpressing the <i>AcrAB</i> pump, porin <sup>+</sup>                                             |           |
| <i>K. aerogenes</i> |                                                                                                            |           |
| Ka 289              | KAN-sensitive derivative of EA27, Porin <sup>-</sup>                                                       | [2]       |
| Ka 298              | EA289 TolC: Kan <sup>r</sup> ; porin <sup>-</sup>                                                          | [2]       |
| Ka ATCC15038        | Parental ATCC strain : porin <sup>+</sup> ; normal efflux                                                  | [3]       |
| Ka CM 64            | CHL <sup>r</sup> variant obtained from ATCC 13048 overexpressing the <i>AcrAB</i> pump; porin <sup>+</sup> | [4]       |

1. Vergalli, J.; Dumont, E.; Cinquin, B.; Maigre, L.; Pajovic, J.; Bacqué, E.; Mourez, M.; Réfrégiers, M.; Pagès, J.-M. Fluoroquinolone Structure and Translocation Flux across Bacterial Membrane. *Scientific Reports* **2017**, *7*, 9821.
2. Masi, M.; Pagès, J.-M.; Pradel, E. Overexpression and Purification of the Three Components of the Enterobacter Aerogenes AcrA–AcrB–TolC Multidrug Efflux Pump. *Journal of Chromatography B* **2003**, *786*, 197–205.
3. Mallea, M.; Chevalier, J.; Bornet, C.; Eyraud, A.; Davin-Regli, A.; Bollet, C.; Pages, J.-M. Porin Alteration and Active Efflux: Two in Vivo Drug Resistance Strategies Used by Enterobacter Aerogenes. *Microbiology* **1998**, *144*, 3003–3009.
4. Ghisalberty, D.; Masi, M.; Pagès, J.-M.; Chevalier, J. Chloramphenicol and Expression of Multidrug Efflux Pump in Enterobacter Aerogenes. *Biochemical and biophysical research communications* **2005**, *328*, 1113–1118.

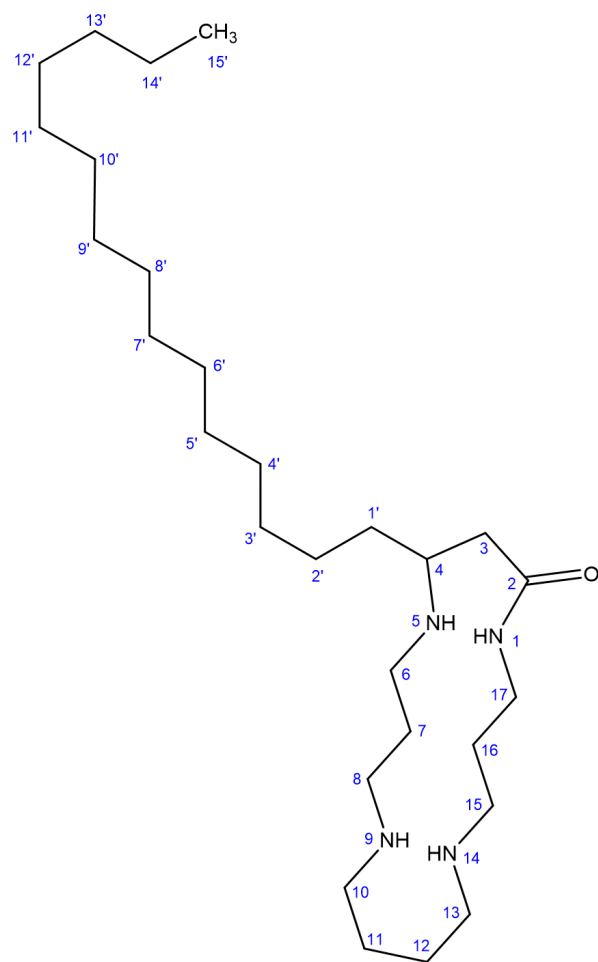

**Figure S1:** Numbering of the Budmunchiamine L5 atoms.

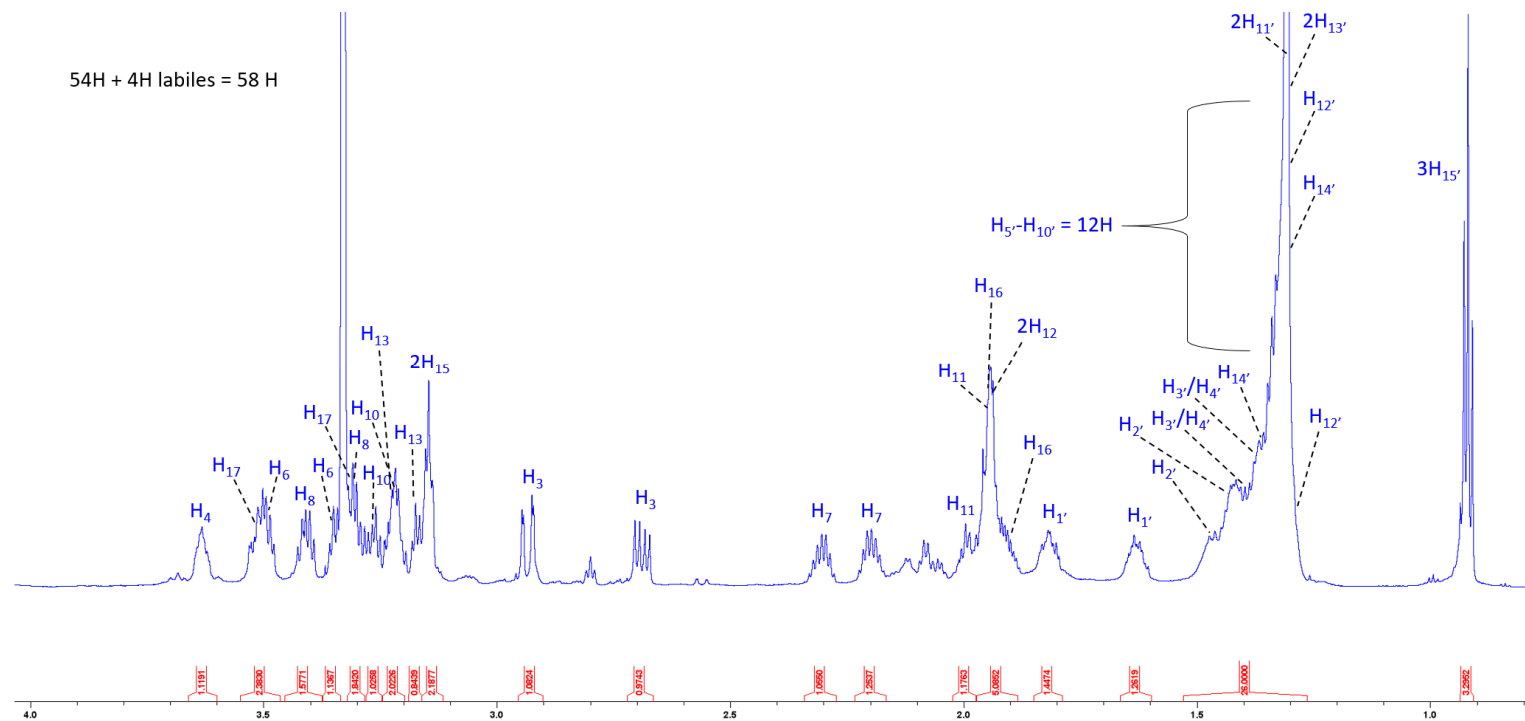

**Figure S2:**  $^1\text{H}$  spectrum of Budmunchiamine L5.

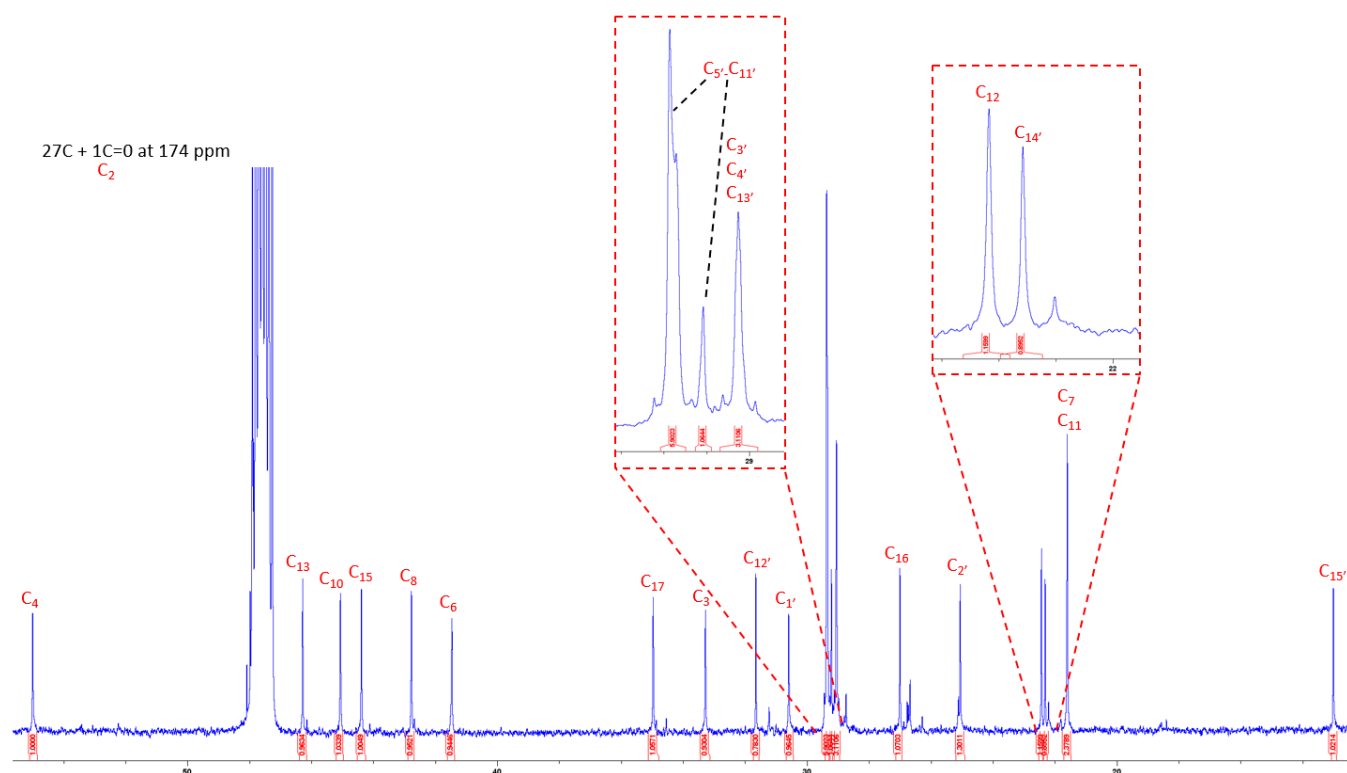

**Figure S3:**  $^{13}\text{C}$  spectrum of Budmunchiamine L5.

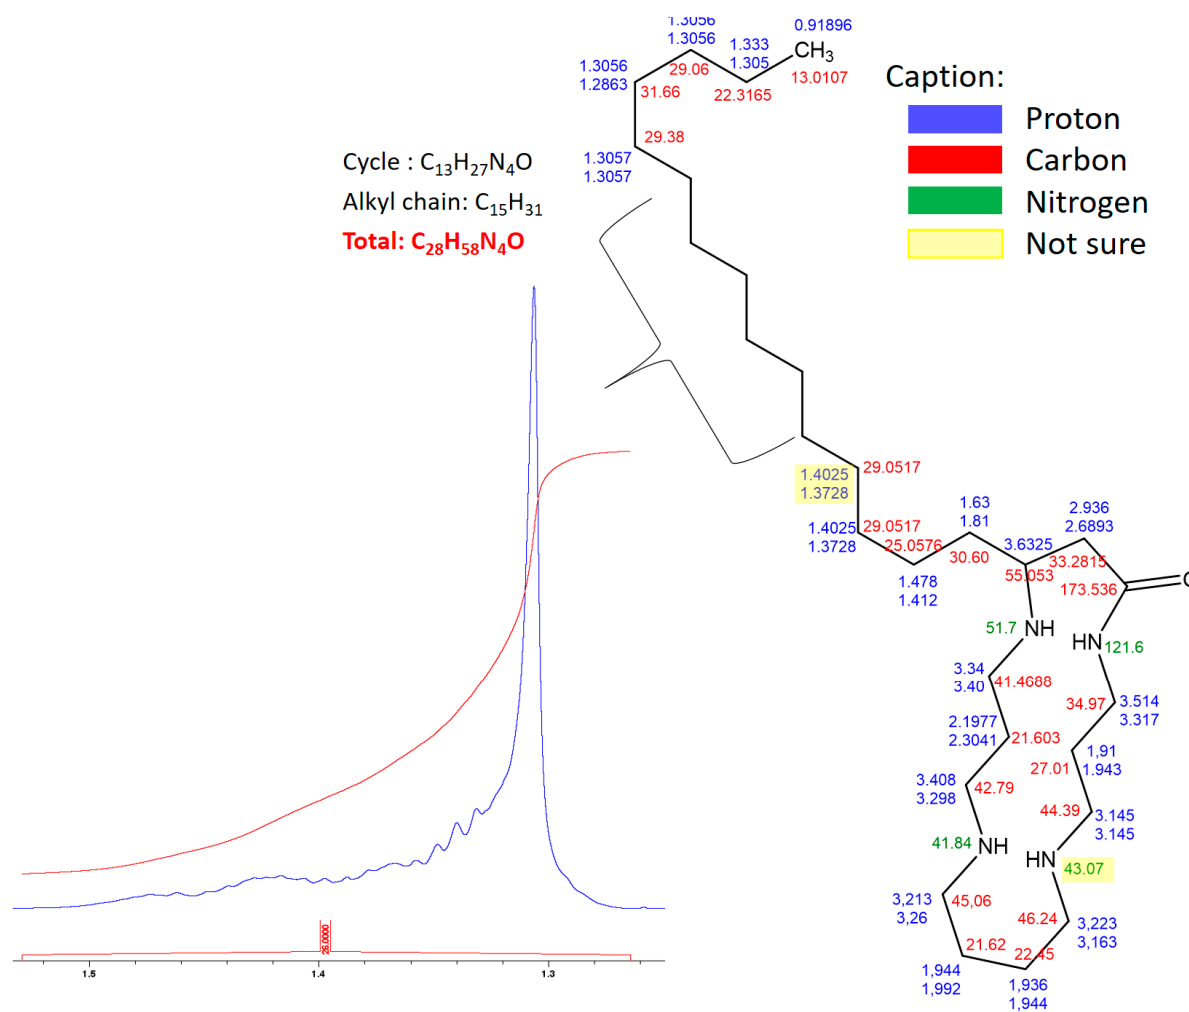

**Figure S4:** Chemical shift assignment of Budmunchiamine L5  $^1H/^{13}C$  and  $^{15}N$ .

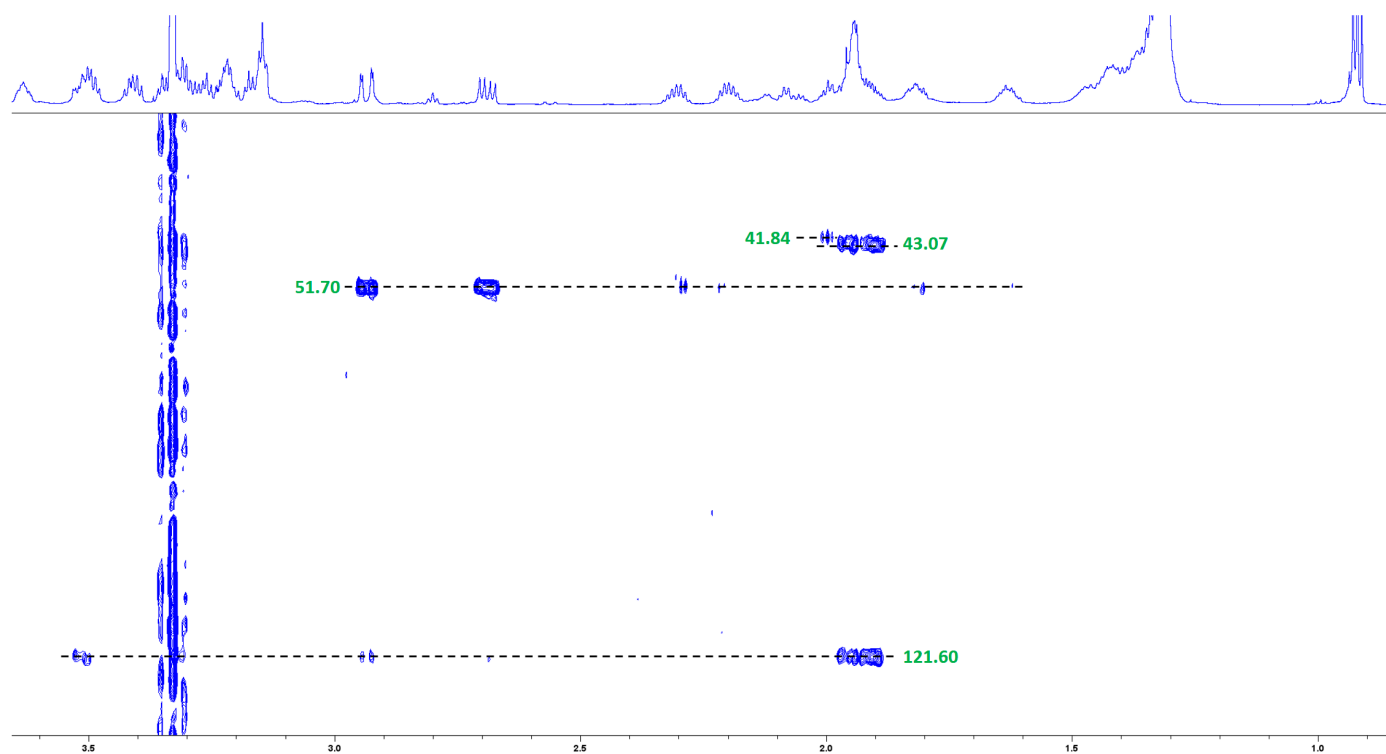

**Figure S5:** Chemical shift assignment of Budmunchiamine L5  $^1\text{H}/^{15}\text{N}$ .
